# Supplementary material for: New NIR-emissive tetranuclear Er(iii) complexes with 4-hydroxo-2,1,3-benzothiadiazolate and dibenzoylmethanide ligands: synthesis and characterization
Source: Royal Society of Chemistry journal article supplement (doi:10.1039/c4dt03878a), 2015-01-01
Supplement: c4dt03878a1.pdf [file c4dt03878a1.pdf]

## Supporting Information

### New NIR-emissive tetranuclear Er(III) complexes with 4-hydroxo-2,1,3-benzothiadiazolate and dibenzoylmethanate ligands: Synthesis and characterization

Taisiya S. Sukhikh, Denis A. Bashirov, Natalia V. Kuratieva, Anton I. Smolentsev, Artyem S. Bogomyakov, Vladimir A. Burilov, Asia R. Mustafina, Andrey V. Zibarev and Sergey N. Konchenko\*

**Table S1.** Crystallographic data of compounds **1**·7C<sub>7</sub>H<sub>8</sub>, **1**·3.5CH<sub>2</sub>Cl<sub>2</sub>, **2**·6THF.

| Compound                                                 | 1·7C <sub>7</sub> H <sub>8</sub>                                                                | 1·3.5CH <sub>2</sub> Cl <sub>2</sub>                                                                             | 2·6THF                                                                                           |
|----------------------------------------------------------|-------------------------------------------------------------------------------------------------|------------------------------------------------------------------------------------------------------------------|--------------------------------------------------------------------------------------------------|
| Empirical formula                                        | C <sub>163</sub> H <sub>136</sub> Er <sub>4</sub> N <sub>8</sub> O <sub>18</sub> S <sub>4</sub> | C <sub>117.5</sub> H <sub>87</sub> Cl <sub>7</sub> Er <sub>4</sub> N <sub>8</sub> O <sub>18</sub> S <sub>4</sub> | C <sub>120</sub> H <sub>112</sub> Er <sub>4</sub> N <sub>12</sub> O <sub>22</sub> S <sub>6</sub> |
| Formula weight                                           | 3292.08                                                                                         | 2944.38                                                                                                          | 2935.62                                                                                          |
| Crystal system                                           | Triclinic                                                                                       | Monoclinic                                                                                                       | Triclinic                                                                                        |
| Space group                                              | <i>P</i> -1                                                                                     | <i>P</i> 2 <sub>1</sub> / <i>c</i>                                                                               | <i>P</i> -1                                                                                      |
| Unit cell dimensions <i>a</i> [Å]                        | 14.1646(4)                                                                                      | 15.6938(4)                                                                                                       | 14.8263(12)                                                                                      |
| <i>b</i> [Å]                                             | 15.2641(4)                                                                                      | 27.3924(8)                                                                                                       | 14.8685(12)                                                                                      |
| <i>c</i> [Å]                                             | 16.4794(5)                                                                                      | 26.7304(8)                                                                                                       | 16.6589(14)                                                                                      |
| $\alpha$ [°]                                             | 87.779(1)                                                                                       | 90                                                                                                               | 65.675(2)                                                                                        |
| $\beta$ [°]                                              | 89.776(1)                                                                                       | 93.327(1)                                                                                                        | 68.993(2)                                                                                        |
| $\gamma$ [°]                                             | 82.376(1)                                                                                       | 90                                                                                                               | 64.225(2)                                                                                        |
| Volume [Å <sup>3</sup> ]                                 | 3528.86(17)                                                                                     | 11471.8(6)                                                                                                       | 2940.5(4)                                                                                        |
| Z                                                        | 1                                                                                               | 4                                                                                                                | 1                                                                                                |
| Density (calcd.) [g cm <sup>-3</sup> ]                   | 1.549                                                                                           | 1.705                                                                                                            | 1.658                                                                                            |
| <i>F</i> (000)                                           | 1650                                                                                            | 5788                                                                                                             | 1460                                                                                             |
| Abs. coefficient [mm <sup>-1</sup> ]                     | 2.483                                                                                           | 3.202                                                                                                            | 3.006                                                                                            |
| Crystal size [mm <sup>3</sup> ]                          | 0.18x0.12x0.10                                                                                  | 0.25x0.25x0.04                                                                                                   | 0.18x0.08x0.02                                                                                   |
| 2 $\theta$ <sub>max</sub> [°]                            | 54.96                                                                                           | 55.18                                                                                                            | 55.18                                                                                            |
| Index range                                              | -18<= <i>h</i> <=18<br>-19<= <i>k</i> <=15<br>-21<= <i>l</i> <=21                               | -20<= <i>h</i> <=12<br>-35<= <i>k</i> <=35<br>-34<= <i>l</i> <=34                                                | -9<= <i>h</i> <=19<br>-15<= <i>k</i> <=19<br>-20<= <i>l</i> <=21                                 |
| Reflections collected                                    | 33663                                                                                           | 85984                                                                                                            | 22102                                                                                            |
| Independent reflections                                  | 16173 [R(int) = 0.0177]                                                                         | 25294 [R(int) = 0.0826]                                                                                          | 13486 [R(int) = 0.0354]                                                                          |
| Completeness to 2 $\theta$ = 50.5° [%]                   | 99.8                                                                                            | 99.2                                                                                                             | 99.7                                                                                             |
| Reflections, <i>I</i> ≥ 2 $\sigma$ ( <i>I</i> )          | 13394                                                                                           | 14004                                                                                                            | 9198                                                                                             |
| Parameters                                               | 838                                                                                             | 1435                                                                                                             | 742                                                                                              |
| Final R indices [ <i>I</i> > 2 $\sigma$ ( <i>I</i> )]    | R1 = 0.0274, wR2 = 0.0657                                                                       | R1 = 0.0705, wR2 = 0.1680                                                                                        | R1 = 0.0425, wR2 = 0.0906                                                                        |
| R indices (all data)                                     | R1 = 0.0377, wR2 = 0.0693                                                                       | R1 = 0.1566, wR2 = 0.1949                                                                                        | R1 = 0.0809, wR2 = 0.1000                                                                        |
| GoF                                                      | 1.053                                                                                           | 1.070                                                                                                            | 0.935                                                                                            |
| Residual electron density (min / max, e/Å <sup>3</sup> ) | -0.822 / 1.815                                                                                  | -2.733 / 4.670                                                                                                   | -2.071 / 1.977                                                                                   |

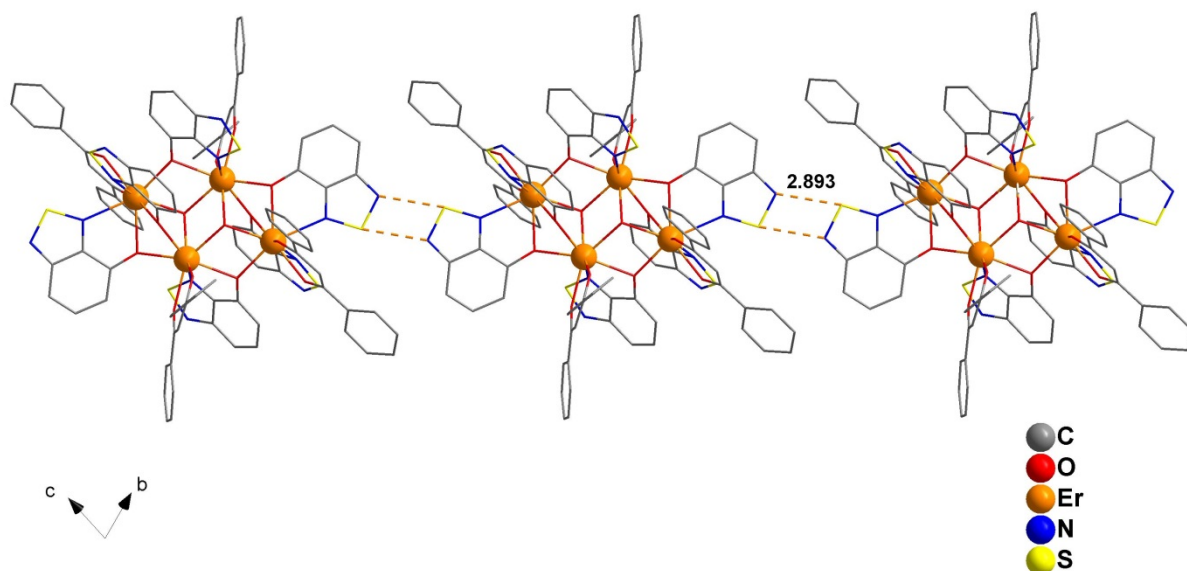

**Fig. S1** Packing diagram of complex **2**·6THF viewed along *a* axis showing intermolecular S···N contacts (dashed)

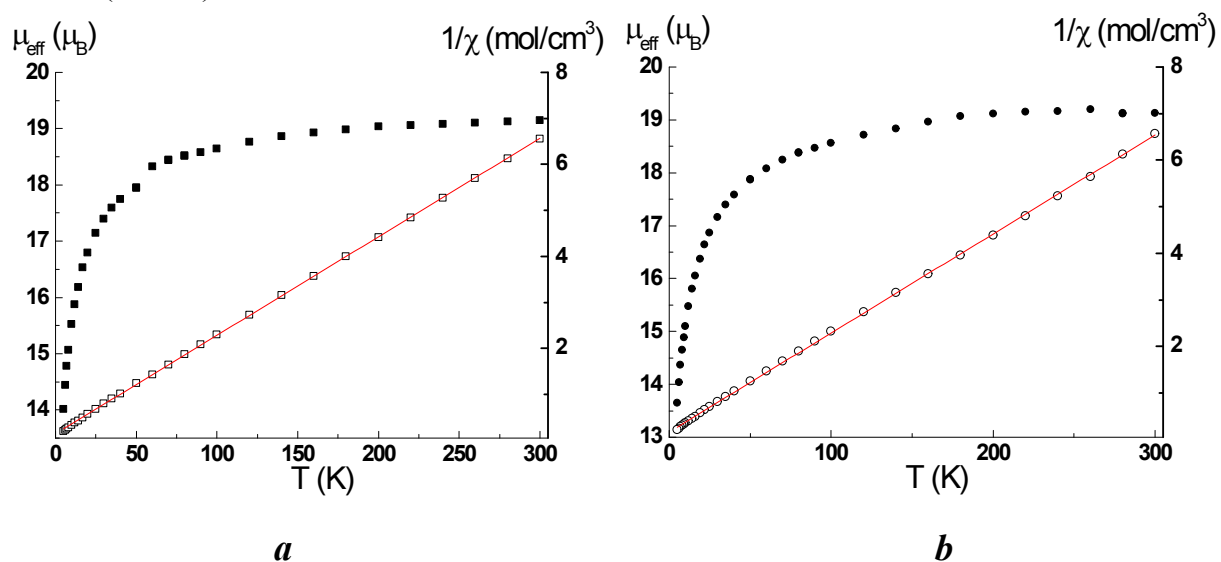

**Fig. S2 a** Temperature dependences of  $\mu_{\text{eff}}$  (●) and  $1/\chi$  (○) for **1**. (solid lines – theoretical curves)

**Fig. S2 b** Temperature dependences of  $\mu_{\text{eff}}$  (■) and  $1/\chi$  (□) for **2**.
